# Supplementary figures and images for: Luminescent iridium(iii) porphyrin complexes as near-infrared-emissive biological probes
Source: Royal Society of Chemistry journal article supplement (doi:10.1039/d3dt02104a), 2023-01-01

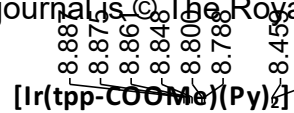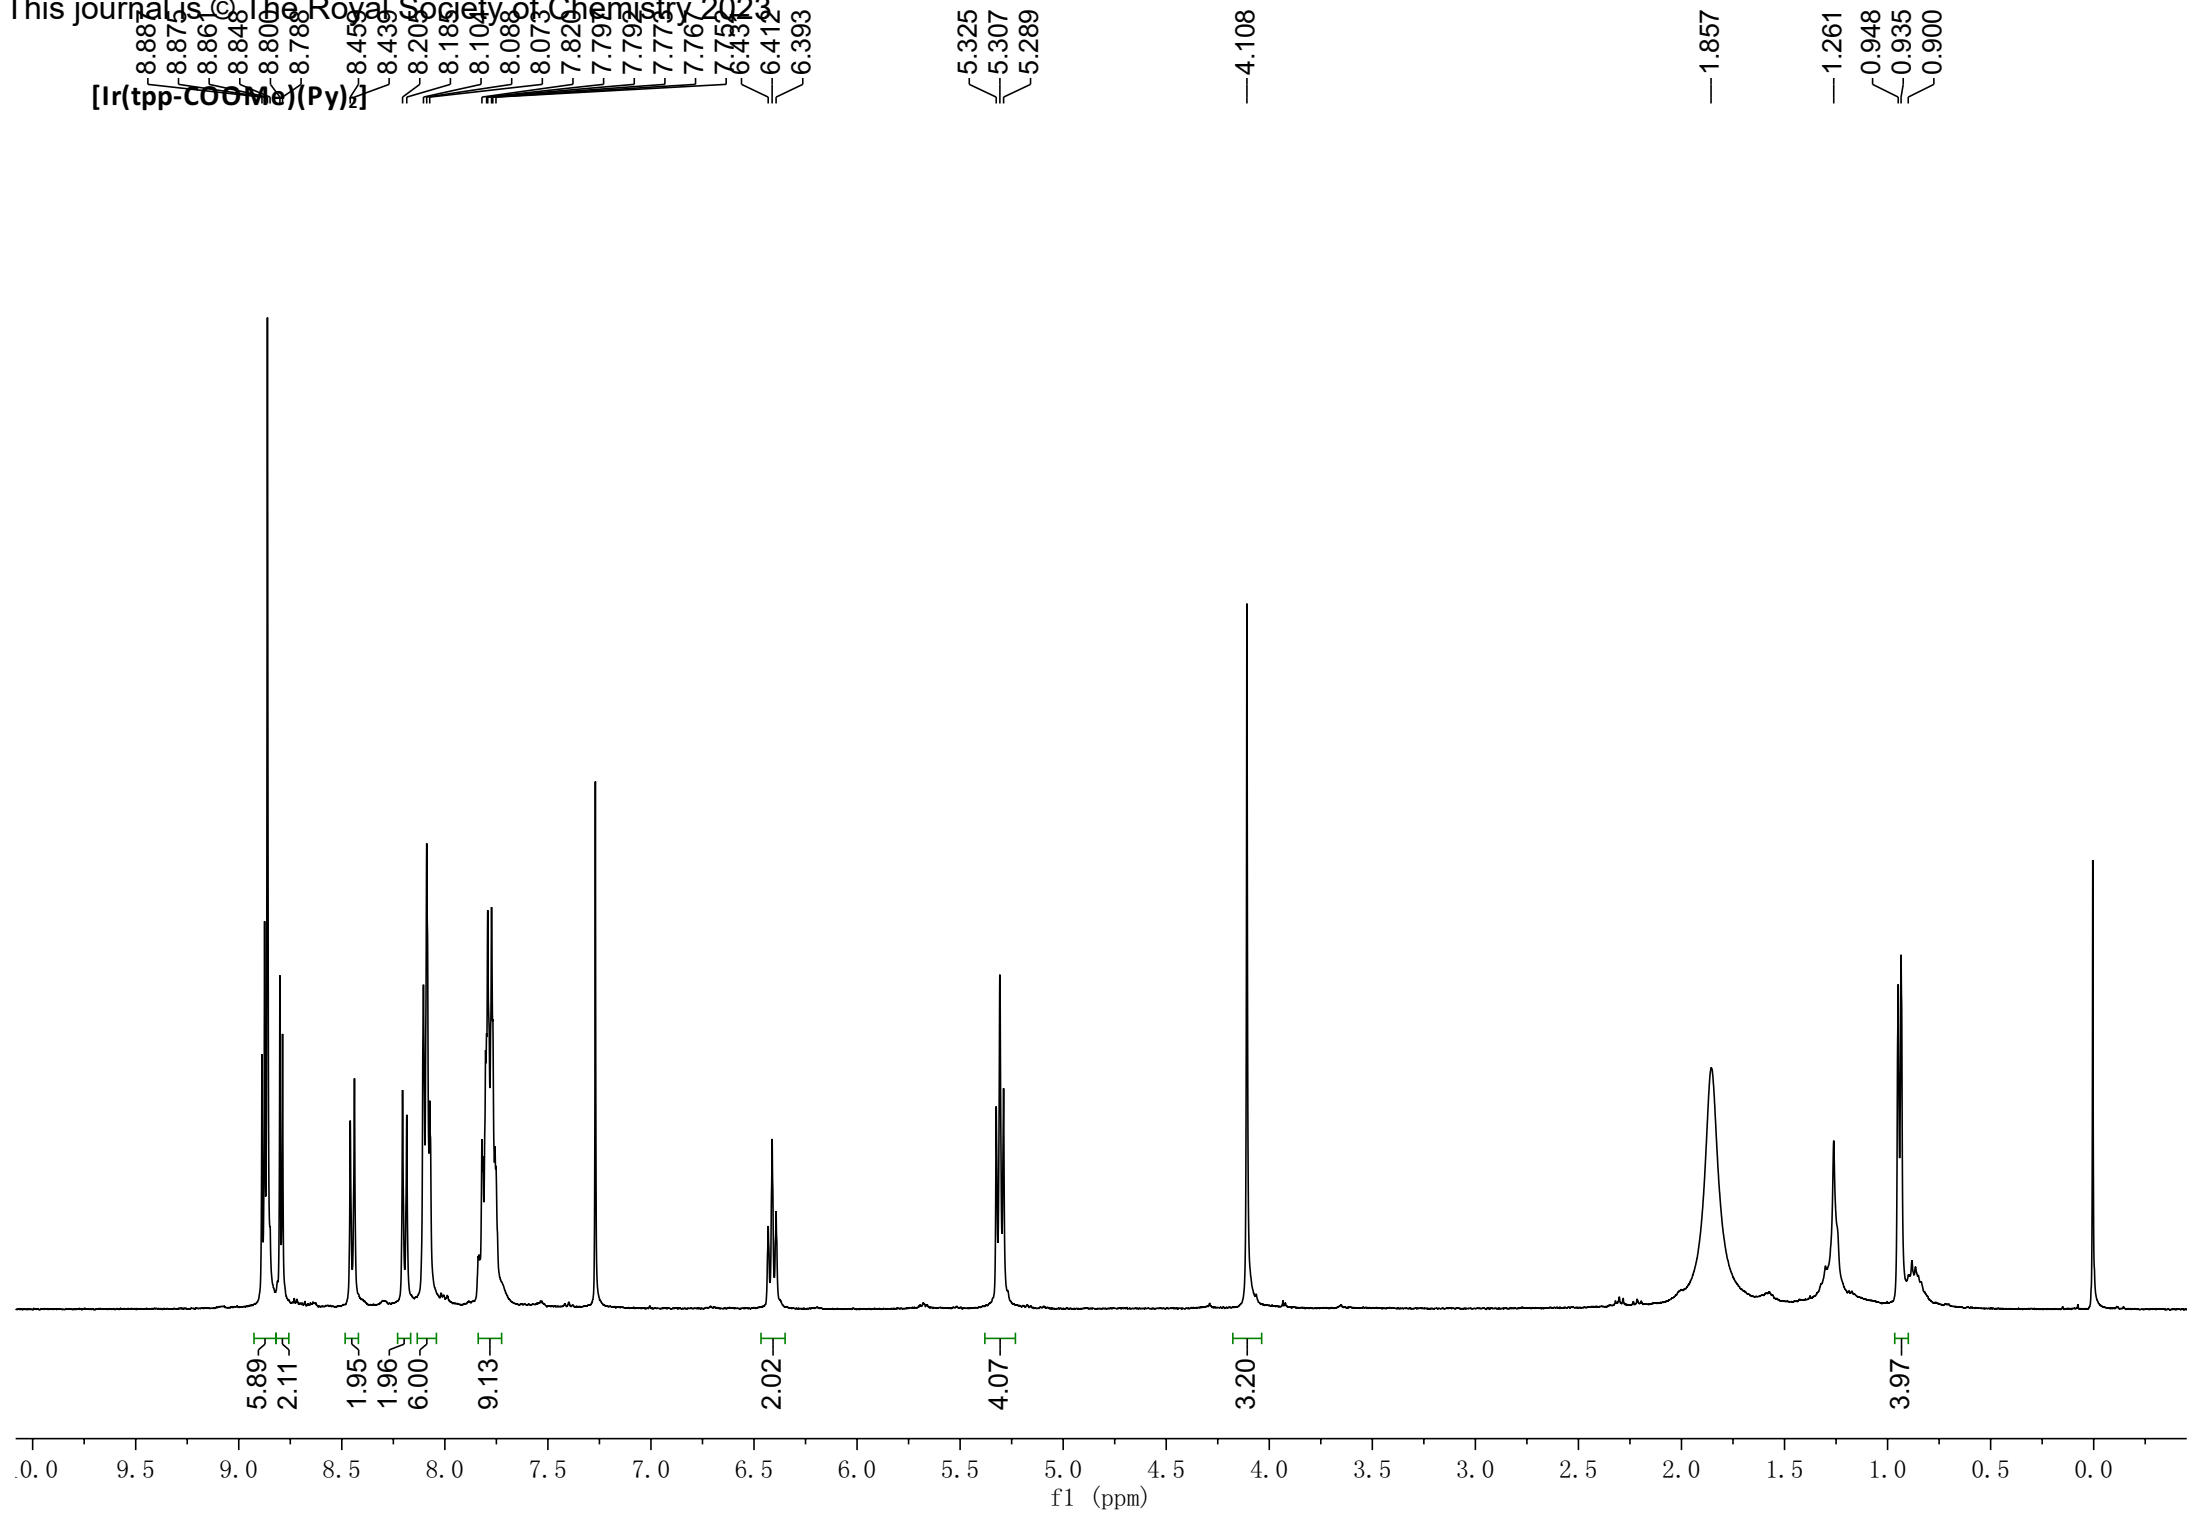

Supplement: d3dt02104a1.pdf [file d3dt02104a1.pdf]

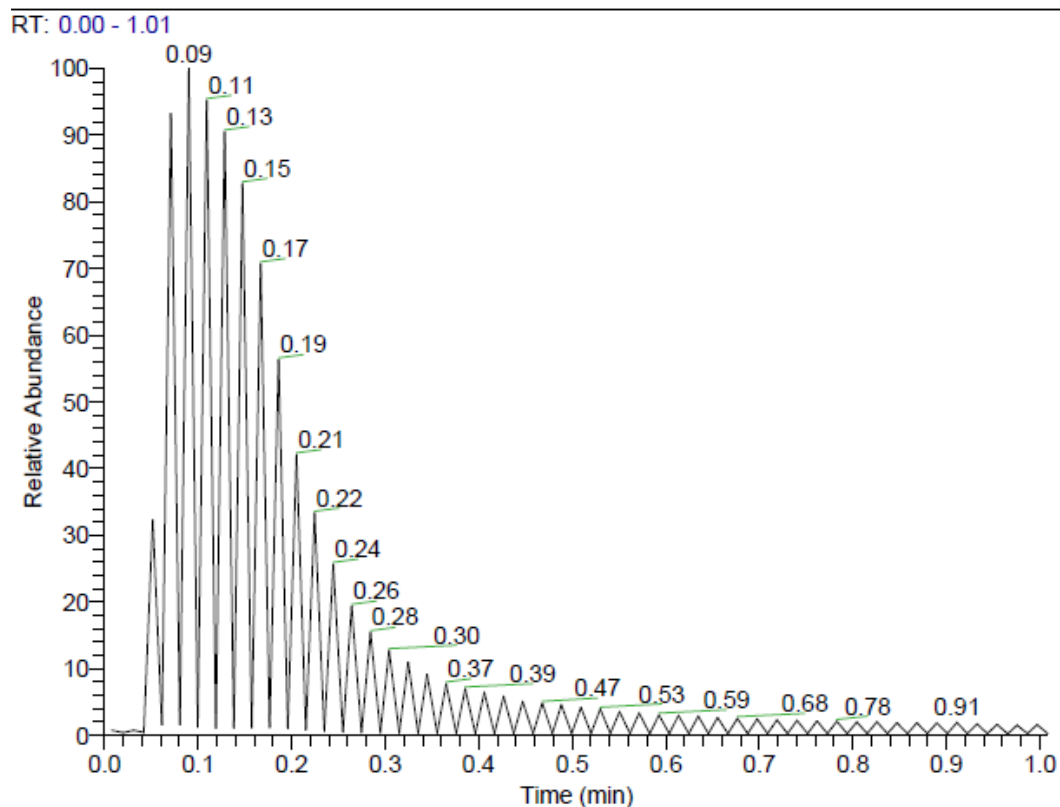

T:  $\bar{F}$ TMS + p ESI Full ms [500.0000-1500.0000]

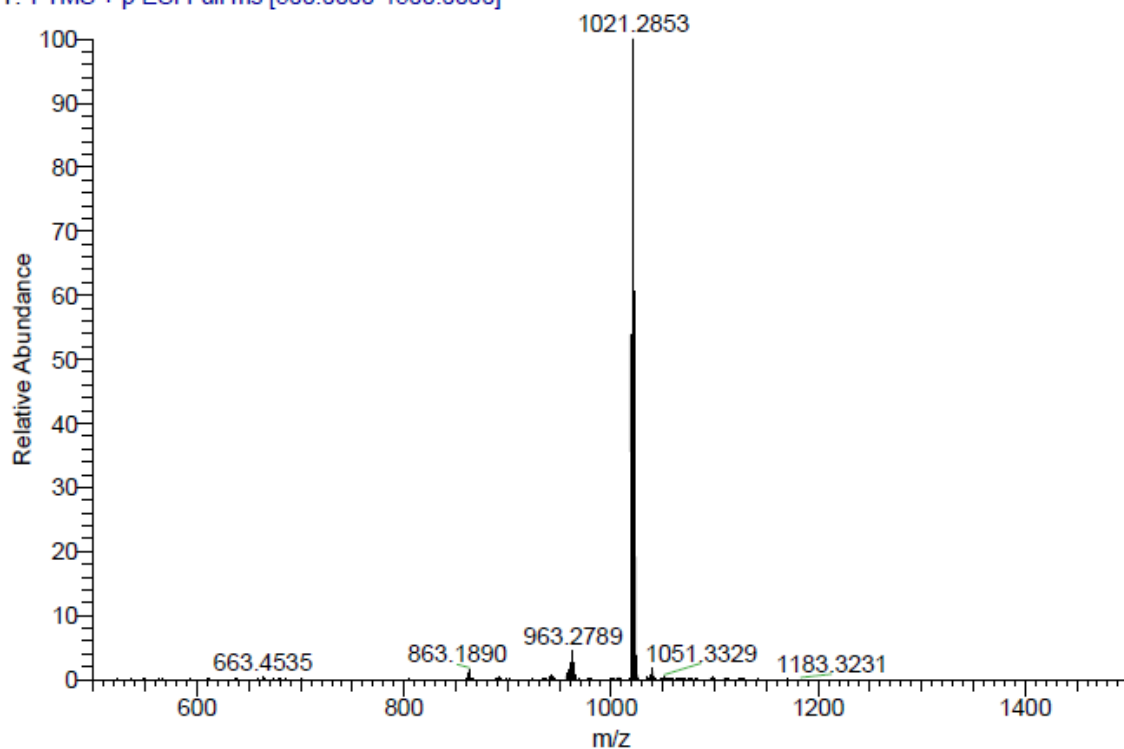

Supplement: d3dt02104a2.pdf [file d3dt02104a2.pdf]

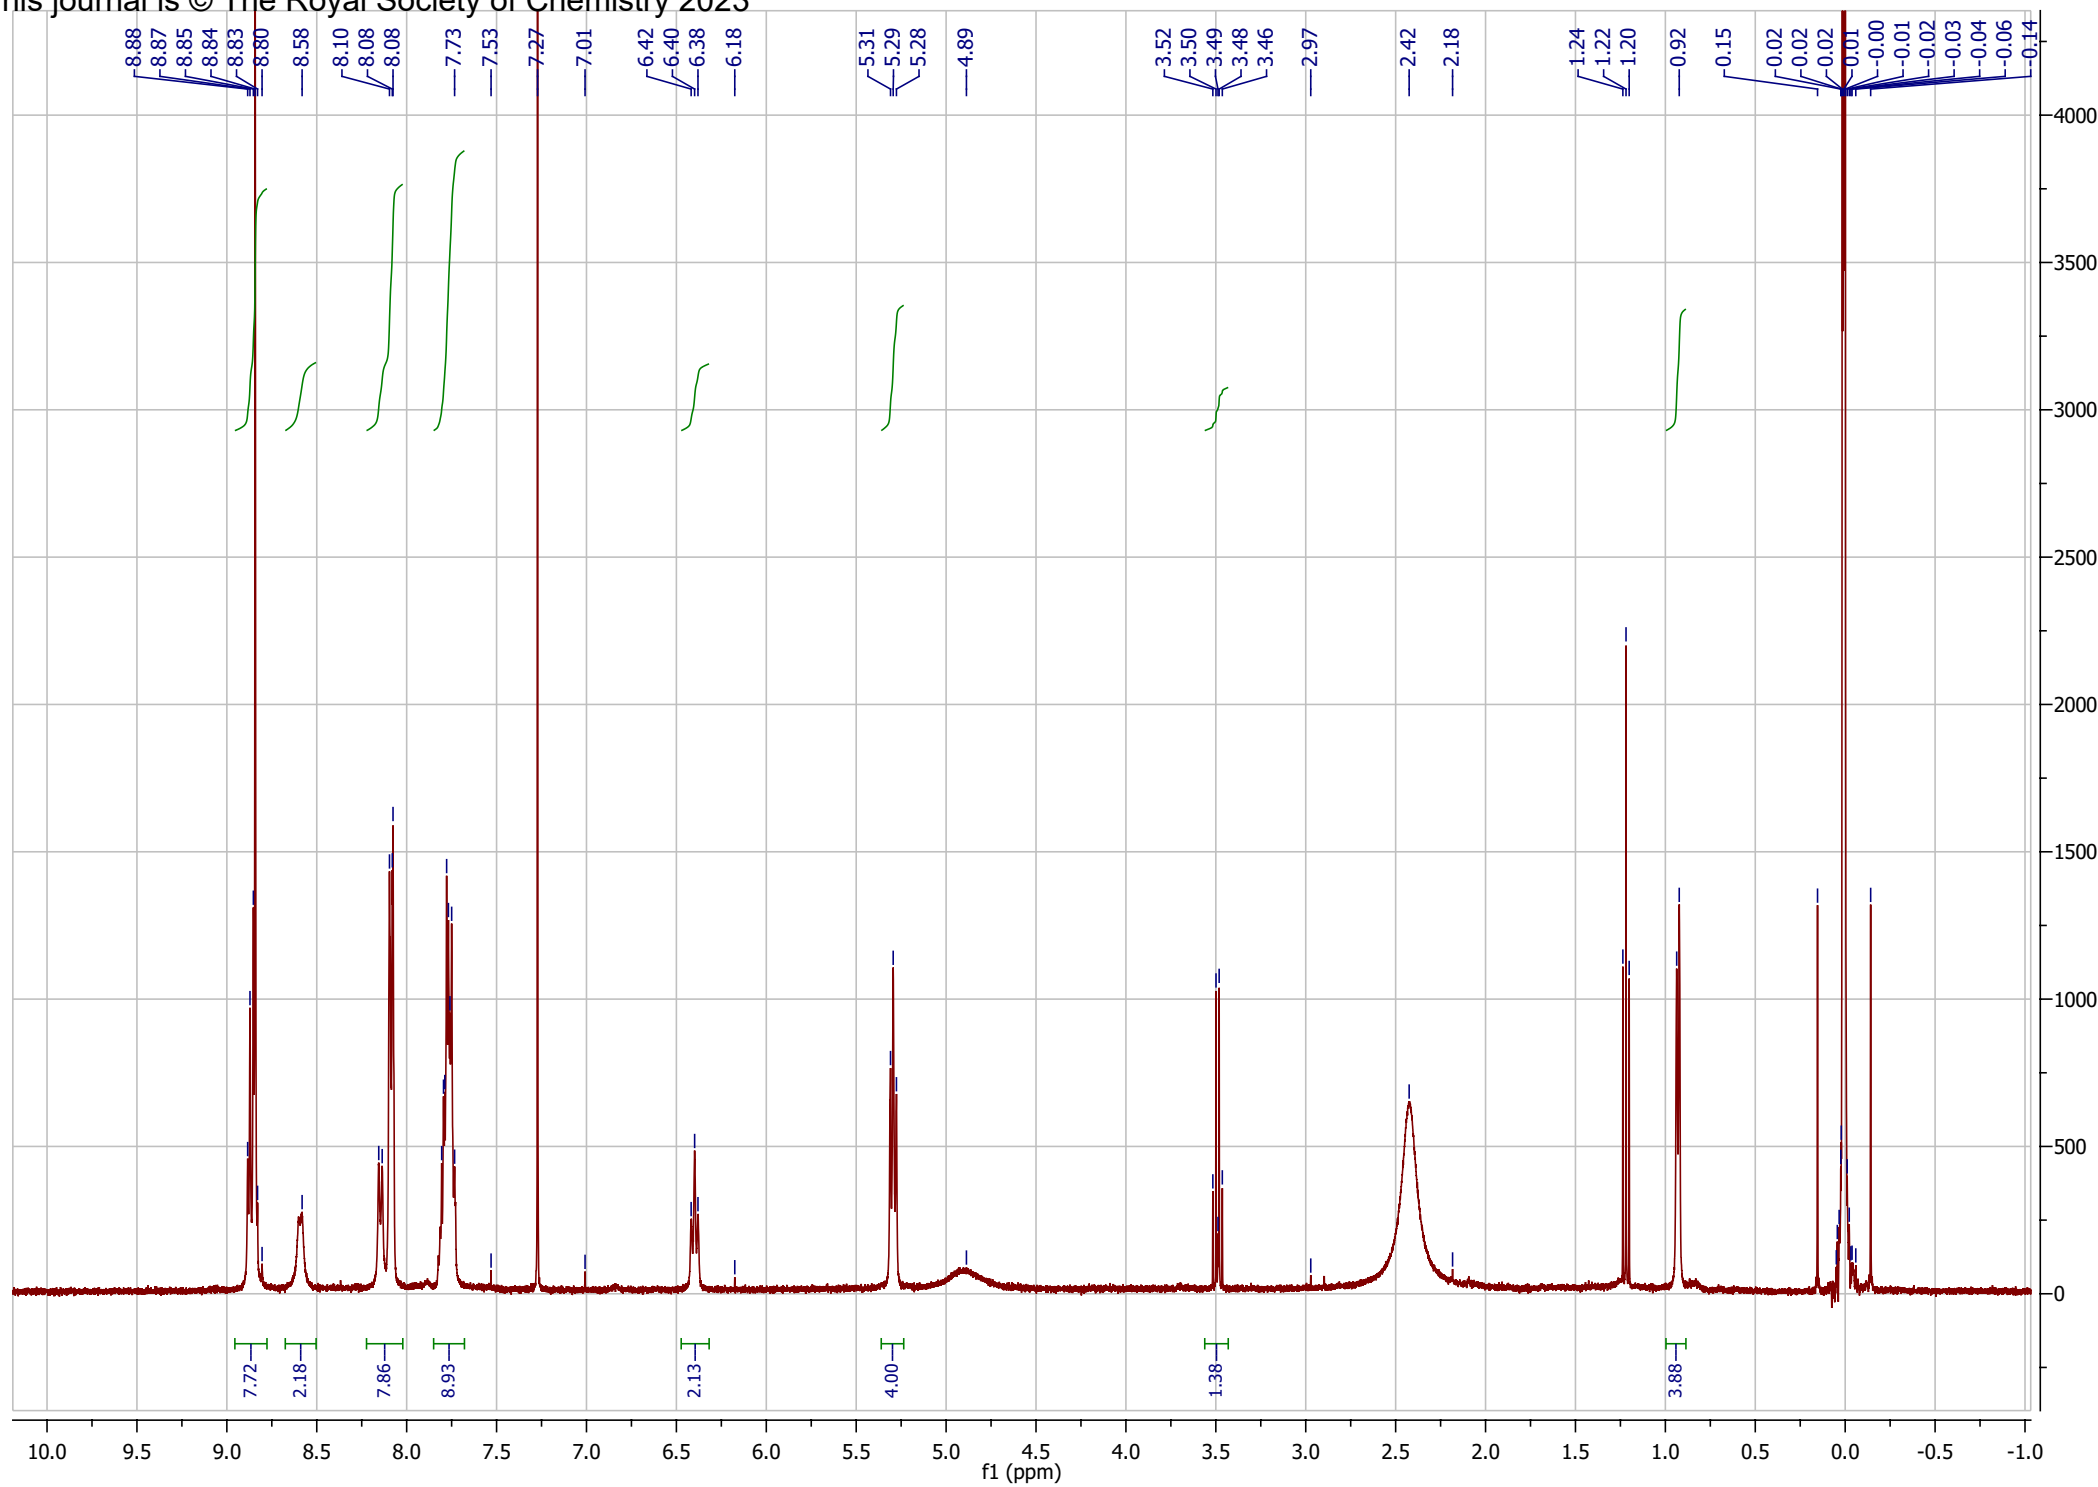

Supplement: d3dt02104a3.pdf [file d3dt02104a3.pdf]

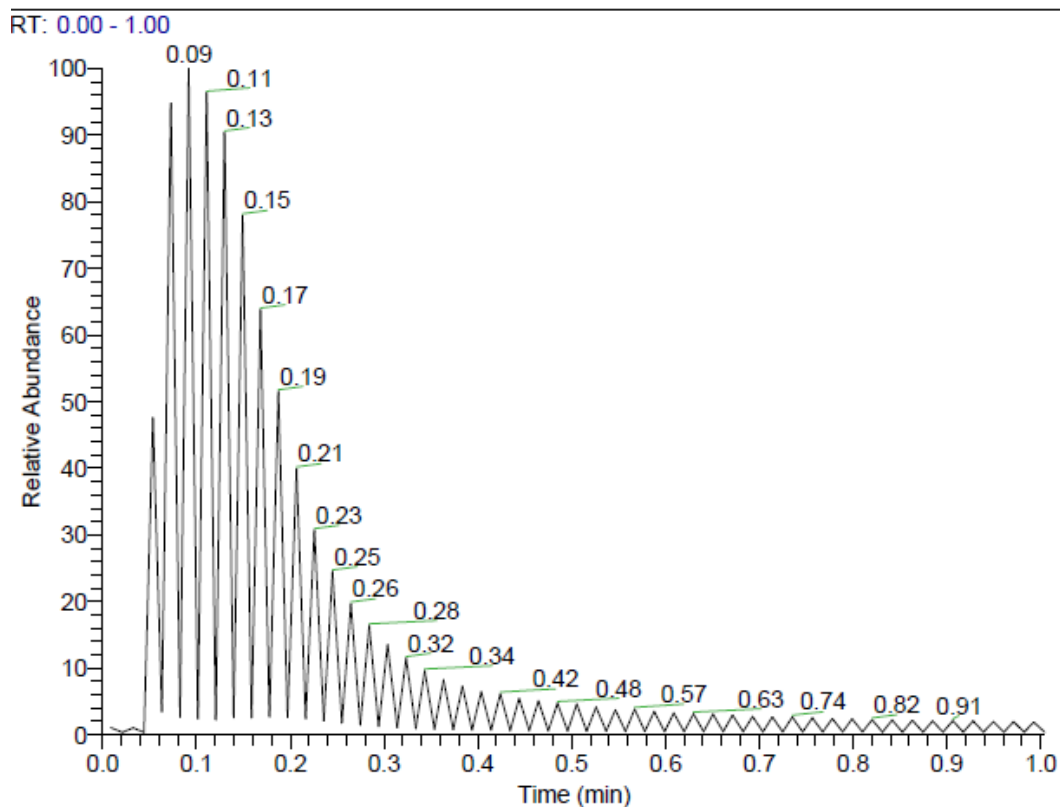

T: FTMS + p ESI Full ms [500.0000-1500.0000]

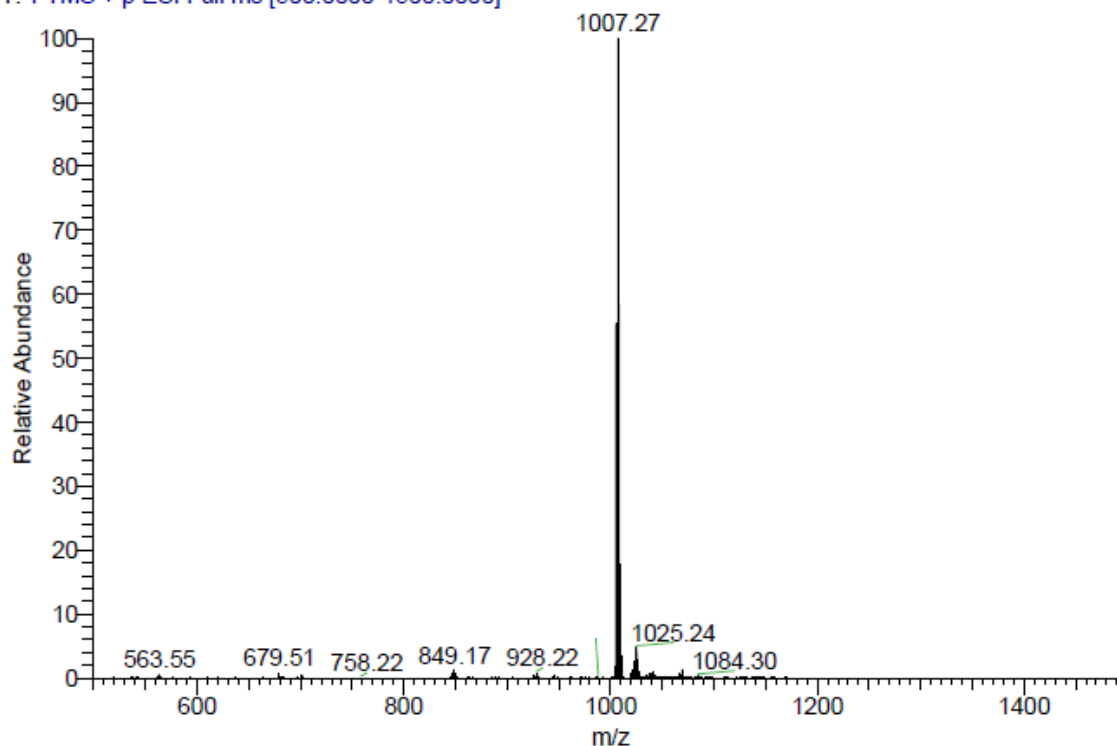

Supplement: d3dt02104a4.pdf [file d3dt02104a4.pdf]
